# Supplementary material
Source: publisher figshare collection journal article supplement (https://sage.figshare.com/ndownloader/files/39020786)
Supplement: Supplementary file 1 [file 39020786]

| **Compound**  Glaucine | **Degree**  38 |
| --- | --- |
| Corydaline | 36 |
| Tetrahydropalmatine | 34 |
| D-Carvone | 33 |
| (-)-Carvone | 33 |
| Quercetin | 27 |
| Undecylenic Acid | 23 |
| 1-Methyl-2-Pentadec-6-Enyl-4(1H)-Quinolone | 23 |
| Yuehchukene | 21 |
| Carvacrol | 20 |
| Beta-Elemene | 18 |
| Humulene | 17 |
| 13-Methylpentadecanoic Acid | 16 |
| Tridecanoic Acid | 16 |
| Isocorydine | 16 |
| Palmitic Acid | 16 |
| Alpha-Pinene | 15 |
| Limonene | 15 |
| Allocryptopine | 15 |
| Corydine | 12 |
| Paeonol | 12 |
| Emodin | 12 |
| Methylephedrine | 12 |
| Protopine | 11 |
| Beta-Sitosterol | 11 |
| Palmatine | 11 |
| Columbamine | 11 |
| (S)-Scoulerine | 11 |
| (S)-Tetrahydrocolumbamine | 10 |
| Oleic Acid | 10 |
| Dihydrochelerythrine | 10 |
| Corydalmine | 9 |
| Scopoletin | 8 |
| (+)-Bicuculline | 8 |
| Umbelliferone | 6 |
| **Gene** | **Degree** |
| PTGS2 | 33 |
| PTGS1 | 26 |
| ADRB2 | 24 |
| SCN5A | 24 |
| SLC6A4 | 17 |
| MAPK1 | 16 |
| INS | 16 |
| TNF | 15 |
| IL1B | 15 |
| ADRA2C | 15 |
| EDN1 | 14 |
| HTR2A | 13 |
| NPPA | 13 |
| AR | 12 |
| ADRB1 | 12 |
| JUN | 12 |
| PDGFB | 12 |
| ADORA1 | 12 |
| CACNA1C | 12 |
| AGT | 12 |

| ESR1 | 11 |
| --- | --- |
| IL6 | 11 |
| TP53 | 10 |
| HTR1B | 10 |
| RHOA | 10 |
| PPARG | 10 |
| HIF1A | 10 |
| TGFB1 | 10 |
| IGF1 | 9 |
| NOS3 | 9 |
| RAC1 | 9 |
| TLR4 | 9 |
| CNR1 | 9 |
| NOS1 | 9 |
| EGFR | 9 |
| UTS2 | 8 |
| PRKCB | 8 |
| ADORA2A | 8 |
| HCN4 | 8 |
| FAS | 8 |
| BDKRB2 | 8 |
| CTNNB1 | 8 |
| IL10 | 8 |
| PLA2G1B | 8 |
| HMOX1 | 7 |
| GHRL | 7 |
| ACE | 7 |
| TAC1 | 7 |
| IL2 | 7 |
| CASP3 | 7 |
| F2 | 6 |
| F2R | 6 |
| PLN | 6 |
| SCN1B | 6 |
| PPARA | 6 |
| BAX | 6 |
| CALCA | 6 |
| ALOX5 | 6 |
| NOS2 | 6 |
| CCL5 | 6 |
| KCNA5 | 6 |
| APOE | 5 |
| NQO1 | 5 |
| PLA2G2A | 5 |
| FGFR2 | 5 |
| KDR | 5 |
| MTNR1B | 5 |
| CSF2 | 5 |
| RYR2 | 5 |
| CYBA | 5 |
| LTA | 5 |
| SCN4B | 5 |
| KCNQ1 | 5 |
| IL4 | 5 |
| LEP | 5 |
| ABL1 | 5 |
| SLC8A1 | 5 |
| CAT | 5 |

| AGTR2 | 5 |
| --- | --- |
| TIRAP | 5 |
| REN | 4 |
| KIT | 4 |
| TPM1 | 4 |
| TNFSF11 | 4 |
| CYP4F2 | 4 |
| **KEGG Pathway** | **Degree** |
| Pathways in cancer | 33 |
| Neuroactive ligand-receptor interaction | 20 |
| cAMP signaling pathway | 18 |
| Fluid shear stress and atherosclerosis | 14 |
| Adrenergic signaling in cardiomyocytes | 14 |
| HIF-1 signaling pathway | 14 |
| Chagas disease (American trypanosomiasis) | 14 |
| HTLV-I infection | 11 |
| Vascular smooth muscle contraction | 11 |
| Colorectal cancer | 10 |
| Serotonergic synapse | 10 |
| Prostate cancer | 9 |
| Renin secretion | 9 |
| NF-kappa B signaling pathway | 8 |
| Alzheimer's disease | 8 |
| foxo signaling pathway | 8 |
| T cell receptor signaling pathway | 8 |
| Renal cell carcinoma | 7 |
| Regulation of lipolysis in adipocytes | 7 |
| Arachidonic acid metabolism | 6 |
